# Supplementary material
Source: PubMed Central journal article supplement (PMC3324030)
Supplement: 1117317109_pnas.201117317SI.pdf [file 1117317109_pnas.201117317SI.pdf]

# Supporting Information

Bras et al. 10.1073/pnas.1117317109

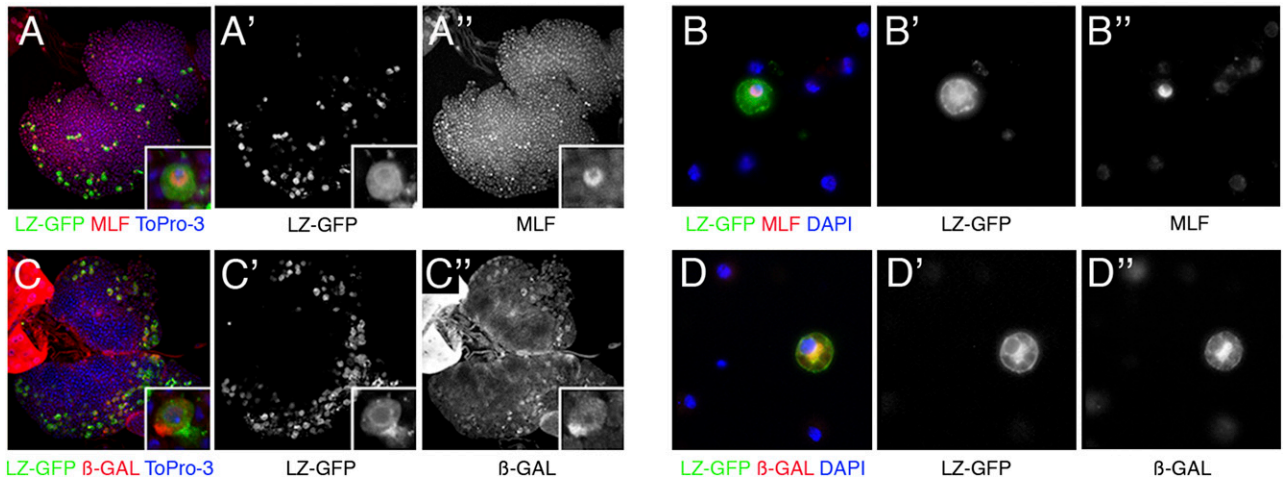

**Fig. S1.** *mlf* is expressed in larval crystal cells. Immunostaining against MLF (A and B) or  $\beta$ -galactosidase (*mlf-lacZ*) (C and D) on third instar larval lymph glands (A and C) or circulating blood cells (B and D). Crystal cells are labeled by GFP (*Iz-Gal4*, *UAS-GFP*). (Insets, A and C) Higher-magnification views of LZ-GFP<sup>+</sup> cells.

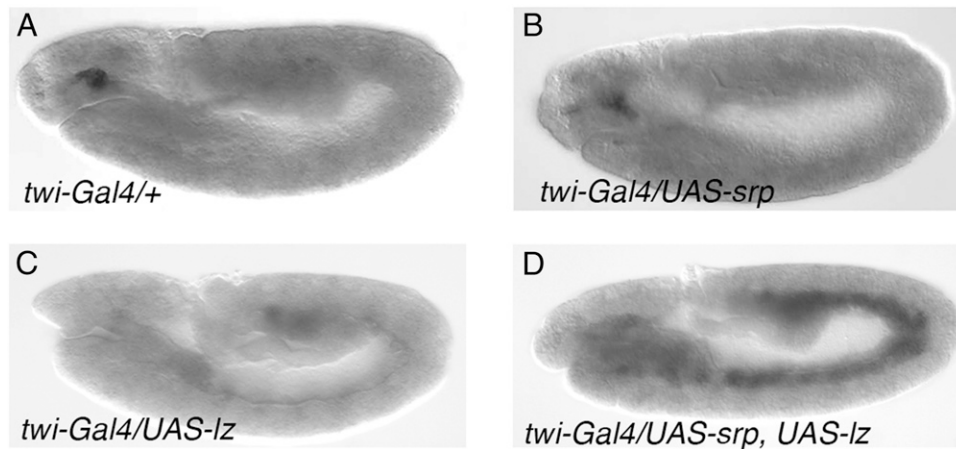

**Fig. S2.** *mlf* expression is activated by SRP/LZ in *Drosophila*. Lateral views of stage 11 embryos showing *mlf* expression as revealed by in situ hybridization. (A–D) Expression of the indicated *UAS* transgenes was driven in the mesoderm under the control of *twi-Gal4*. *twi-Gal4*-driven ectopic coexpression of SRP and LZ induces *mlf* transcription throughout the mesoderm.

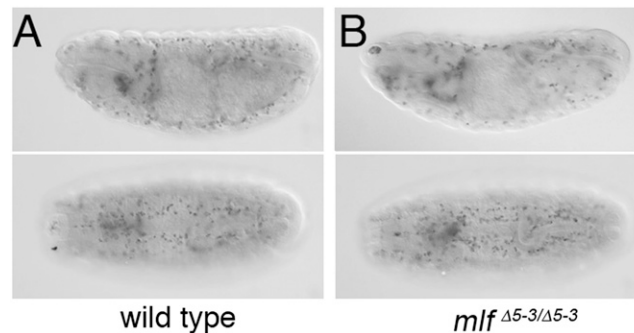

**Fig. S3.** *mlf* mutation does not impair embryonic plasmatocyte development. In situ hybridization against *pxn* was used to monitor plasmatocyte differentiation in WT (A) and *mlf* mutant (B) stage 16 embryos. (Upper) Lateral views. (Lower) Dorsal views.



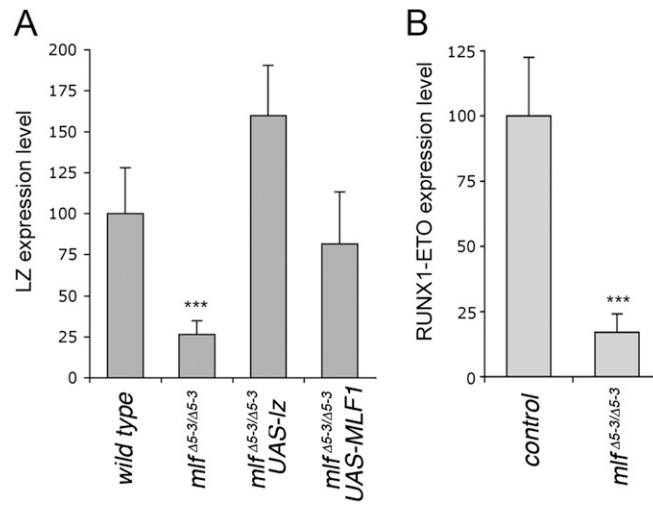

**Fig. S6.** MLF stabilizes LZ and RUNX1-ETO protein levels in vivo. (A) Fluorescent immunostaining against LZ was used to monitor LZ expression levels in circulating larval blood cells from *lz-Gal4*, *UAS-GFP* third instar larvae of the indicated genotype. (B) Fluorescent immunostaining against RUNX1-ETO was used to assess RUNX1-ETO expression levels in circulating larval blood cells from *lz-Gal4*, *UAS-GFP*; *UAS-RUNX1-ETO* (control) or *lz-Gal4*, *UAS-GFP*; *mlf<sup>Δ5-3</sup>/mlf<sup>Δ5-3</sup>*; *UAS-RUNX1-ETO* (*mlf<sup>Δ5-3</sup>/mlf<sup>Δ5-3</sup>*) third instar larvae. Fluorescent intensities were measured using ImageJ software on a minimum of 15 LZ-GFP<sup>+</sup> cells of each genotype. \*\*\* $P < 0.0001$ , Student *t* test.
